# Supplementary material for: Clinical value of plasma ALZpath pTau217 immunoassay for assessing mild cognitive impairment
Source: bioRxiv or medRxiv preprint supplement (doi:10.1101/2024.01.21.24301570), 2024-03-05
Supplement: Supplementary file [file media-1.pdf]

# **Clinical value of plasma ALZpath pTau217 immunoassay in the assessment of mild cognitive impairment**

Sylvain Lehmann, MD<sup>1\*</sup>, Susanna Schraen-Maschke, PhD<sup>2</sup>, Jean-Sébastien Vidal, MD<sup>3</sup>, Constance Delaby, PhD<sup>1,4</sup>, Luc Buée PhD<sup>2</sup>, Frédéric Blanc, MD<sup>5</sup>, Claire Paquet, MD<sup>6</sup>, Bernadette Allinquant, PhD<sup>7</sup>, Stéphanie Bombois, MD<sup>2,8</sup>, Audrey Gabelle, MD<sup>9</sup>, Olivier Hanon, MD<sup>3\*</sup> on behalf of the BALTAZAR study group.

## **Supplementary data**

**Page 2: Supplementary Table 1:** Distribution of plasma pTau217, plasma pTau181 and CSF pTau181 in A $\beta$ - and A $\beta$ + population

**Page 3: Supplementary Table 2.** Biological values in MCI population.

**Page 4: Supplementary Table 3:** Risk factors associated with conversion to dementia during follow up

**Page 5: Supplementary Table 4:** Correlation between plasma pTau181, pTau217 and clinical chemistry analytes

**Page 5: Supplementary Figure 1:** Correlation between plasma pTau217, plasma pTau181 and hippocampal volume.

**Page 6: Supplementary Figure 2:** Correlation between plasma pTau217 and pTau181 and CSF pTau181 in MCI according to amyloid status.

**Page 7: Supplementary Figure 3:** Distribution and ROC curves of plasma pTau217 and pTau181 in MCI according to conversion to AD.

**Supplementary Table 1: Distribution of plasma pTau217, plasma pTau181 and CSF pTau181 in A $\beta$ - and A $\beta$ + population**

| Factors                 | n A $\beta$ - | Value (Mean(sd)) | n A $\beta$ + | Value (Mean(sd)) | A $\beta$ - vs A $\beta$ + (p) | Fold change |
|-------------------------|---------------|------------------|---------------|------------------|--------------------------------|-------------|
| Plasma pTau217 (pg/mL)  | 97            | 0.28 (0.19)      | 116           | 0.75 (0.34)      | <.0001                         | 2.67        |
| Plasma pTau 181 (pg/mL) | 97            | 2.60 (1.42)      | 116           | 3.87 (1.38)      | <.0001                         | 1.48        |
| CSF pTau181 (pg/mL)     | 97            | 51.9 (16.0)      | 116           | 79.1 (32.3)      | <.0001                         | 1.52        |

Values as mean  $\pm$  standard deviation in the number (n) of MCI participants in A $\beta$ - and A $\beta$ + population with t-student comparison test

**Supplementary Table 2. Biological values in MCI population.**

|                                   | Total<br>n<br>MCI | Value<br>(Mean(sd)) | A $\beta$ - | Value<br>(Mean(sd)) | A $\beta$ + | Value<br>(Mean(sd)) | A $\beta$ - vs<br>A $\beta$ +(<br>p) | Adjusted<br>age, sex,<br>APOE<br>$\epsilon$ 4,<br>education | n MCI<br>Non<br>Converter | Value<br>(Mean(sd)) | n MCI<br>Converter | Value<br>(Mean(sd)) | Converter<br>vs non<br>converter<br>(p) | Adjusted<br>age, sex,<br>APOE<br>$\epsilon$ 4,<br>education |
|-----------------------------------|-------------------|---------------------|-------------|---------------------|-------------|---------------------|--------------------------------------|-------------------------------------------------------------|---------------------------|---------------------|--------------------|---------------------|-----------------------------------------|-------------------------------------------------------------|
| Adiponectin (ug/mL)               | 472               | 8.86 (6.22)         | 97          | 7.05 (4.25)         | 116         | 8.59 (5.92)         | 0.0279                               | 0.1331                                                      | 337                       | 8.94 (6.49)         | 135                | 8.64 (5.49)         | 0.6037                                  | 0.3337                                                      |
| Fasting glycemia (mmol/L)         | 439               | 5.37 (1.19)         | 90          | 5.42 (1.15)         | 114         | 5.42 (1.16)         | 0.9977                               | 0.6896                                                      | 311                       | 5.33 (1.2)          | 128                | 5.45 (1.17)         | 0.3300                                  | 0.2035                                                      |
| Triglycerides (mmol/L)            | 421               | 5.5 (1.16)          | 87          | 5.54 (1.26)         | 107         | 5.5 (1.12)          | 0.8158                               | 0.2670                                                      | 297                       | 1.22 (0.6)          | 124                | 1.22 (0.55)         | 0.9890                                  | 0.8715                                                      |
| Cholesterol total (mmol/L)        | 419               | 1.74 (0.52)         | 87          | 1.76 (0.49)         | 108         | 1.71 (0.51)         | 0.5282                               | 0.7774                                                      | 297                       | 5.46 (1.2)          | 124                | 5.57 (1.06)         | 0.3540                                  | 0.4530                                                      |
| Cholesterol HDL (mmol/L)          | 417               | 3.2 (1)             | 87          | 3.25 (1.07)         | 107         | 3.25 (0.92)         | 0.9933                               | 0.1931                                                      | 296                       | 1.74 (0.53)         | 123                | 1.73 (0.48)         | 0.8324                                  | 0.6706                                                      |
| Cholesterol LDL (mmol/L)          | 421               | 1.22 (0.59)         | 87          | 1.18 (0.48)         | 108         | 1.15 (0.69)         | 0.7116                               | 0.6172                                                      | 295                       | 3.17 (1.02)         | 122                | 3.28 (0.96)         | 0.2794                                  | 0.4081                                                      |
| Creatinine ( $\mu$ mol/L)         | 443               | 78.21 (20.97)       | 92          | 80.15 (24.88)       | 113         | 78.31 (20.02)       | 0.5657                               | 0.7440                                                      | 316                       | 78.36 (20.47)       | 127                | 77.84 (22.25)       | 0.8216                                  | 0.4137                                                      |
| eGFR (mL/min/1.73m <sup>2</sup> ) | 444               | 76.99 (14.7)        | 92          | 77.51 (15.55)       | 114         | 76.69 (15.34)       | 0.7061                               | 0.5876                                                      | 317                       | 76.81 (14.94)       | 127                | 77.44 (14.14)       | 0.6766                                  | 0.4420                                                      |
| Prealbumin (mg/dl)                | 385               | 0.279 (0.061)       | 84          | 0.285 (0.077)       | 99          | 0.282 (0.05)        | 0.7025                               | 0.5216                                                      | 268                       | 0.28 (0.06)         | 117                | 0.28 (0.06)         | 0.4165                                  | 0.3961                                                      |
| Albumin (g/L)                     | 442               | 40.32 (3.9)         | 93          | 39.89 (3.59)        | 110         | 40.19 (4.9)         | 0.6183                               | 0.3942                                                      | 318                       | 40.52 (3.53)        | 124                | 39.81 (4.68)        | 0.1279                                  | 0.1349                                                      |
| Total protein (g/L)               | 430               | 70.46 (6.67)        | 90          | 70.69 (5.69)        | 111         | 70.31 (4.1)         | 0.5889                               | 0.7118                                                      | 305                       | 70.33 (7.41)        | 125                | 70.75 (4.38)        | 0.4715                                  | 0.4367                                                      |
| CRP (mg/L)                        | 438               | 3.21 (5.39)         | 90          | 4.76 (8.71)         | 111         | 2.28 (2.7)          | 0.0107                               | 0.0120                                                      | 314                       | 3.05 (4.59)         | 124                | 3.63 (7.01)         | 0.3959                                  | 0.1054                                                      |
| Hemoglobin (g/dL)                 | 439               | 13.8 (1.15)         | 91          | 13.76 (1.21)        | 112         | 13.84 (0.95)        | 0.5831                               | 0.2239                                                      | 312                       | 13.75 (1.19)        | 127                | 13.92 (1.04)        | 0.1594                                  | 0.2466                                                      |
| Vitamin B12 (pmol/L)              | 408               | 310.9 (131.7)       | 86          | 322.4 (156.2)       | 101         | 307.5 (108.3)       | 0.4559                               | 0.2743                                                      | 291                       | 315.27 (137.18)     | 101                | 300 (116.79)        | 0.2576                                  | 0.4200                                                      |
| TSH (mU/L)                        | 391               | 2.31 (2.69)         | 83          | 2.29 (2.73)         | 101         | 2.39 (3)            | 0.8137                               | 0.6952                                                      | 274                       | 2.25 (2.22)         | 101                | 2.43 (3.57)         | 0.6139                                  | 0.6643                                                      |
| Folate (nmol/L)                   | 216               | 29.45 (47.32)       | 32          | 40.44 (71.58)       | 42          | 21.69 (24.3)        | 0.1640                               | 0.0238                                                      | 156                       | 30.03 (44.11)       | 42                 | 27.97 (55.17)       | 0.7963                                  | 0.9238                                                      |
| Red-cell folate (nmol/L)          | 343               | 1239 (726)          | 78          | 1404 (1015)         | 88          | 1328 (656)          | 0.5722                               | 0.9222                                                      | 240                       | 1225 (737)          | 88                 | 1271 (701)          | 0.5796                                  | 0.3599                                                      |

Values in the number (n) of MCI participants for which different data types were available and comparison between non-converter and converters, with t-student or  $\chi^2$  and linear regression adjusted for age, sex, and the presence of the APOE  $\epsilon$ 4 allele; numbers were used to describe categorical variables. mean  $\pm$  standard deviation for continuous variables. After Bonferroni adjustment, the significant P value is set at 0.003. Abbreviations: MCI: mild cognitive impairment; eGFR, estimated glomerular filtration rate; sd, standard deviation.

### Supplementary Table 3: Risk factors associated with conversion to dementia during follow up

| Factors           | n   | HR Conversion (95%CI) | p      | p adjusted (age, sex, ApoE) |
|-------------------|-----|-----------------------|--------|-----------------------------|
| Adiponectin       | 472 | 0.96 (1.02-1.02)      | 0.5870 | 0.2982                      |
| Fasting glycemia  | 439 | 0.97 (1.27-1.27)      | 0.1208 | 0.0540                      |
| Triglycerides     | 421 | 0.88 (1.64-1.64)      | 0.2389 | 0.1680                      |
| Cholesterol total | 421 | 0.92 (1.24-1.24)      | 0.3886 | 0.1671                      |
| Cholesterol HDL   | 419 | 0.59 (1.17-1.17)      | 0.2824 | 0.8413                      |
| Cholesterol LDL   | 417 | 0.95 (1.34-1.34)      | 0.1835 | 0.1404                      |
| Creatinine        | 443 | 0.99 (1.01-1.01)      | 0.7844 | 0.5356                      |
| eGFR              | 444 | 0.99 (1.01-1.01)      | 0.9811 | 0.7385                      |
| Prealbumin        | 385 | 0.01 (5.35-5.35)      | 0.3690 | 0.4187                      |
| Albumin           | 442 | 0.90 (0.99-0.99)      | 0.0193 | 0.0272                      |
| Total protein     | 430 | 0.98 (1.04-1.04)      | 0.7511 | 0.6173                      |
| CRP               | 438 | 0.99 (1.05-1.05)      | 0.2197 | 0.0452                      |
| Hemoglobin        | 439 | 0.97 (1.31-1.31)      | 0.1140 | 0.1336                      |
| Vitamin B12       | 408 | 1.00 (1.00-1.00)      | 0.2269 | 0.4278                      |
| TSH               | 391 | 0.97 (1.10-1.10)      | 0.3234 | 0.637                       |
| Folate            | 216 | 0.99 (1.00-1.00)      | 0.4958 | 0.8443                      |
| Red-cell folate   | 343 | 1.00 (1.00-1.00)      | 0.9336 | 0.5171                      |

Cox proportional hazard model of conversion to dementia in follow-up before and after adjustment for age, sex, educational level, and the APOE  $\epsilon 4$  status. Abbreviations: HR, hazard ratio for conversion; CI: confidence interval.

**Supplementary Table 4: Correlation between plasma pTau181, pTau217 and clinical chemistry analytes**

|                          | pTau181 |                         |                      | pTau217 |                         |                      |
|--------------------------|---------|-------------------------|----------------------|---------|-------------------------|----------------------|
|                          | n       | Correlation coefficient | Significance Level P | n       | Correlation coefficient | Significance Level P |
| <b>Adiponectin</b>       | 472     | 0.074                   | 0.1089               | 472     | 0.064                   | 0.164                |
| <b>Fasting glycemia</b>  | 439     | -0.084                  | 0.0795               | 439     | -0.058                  | 0.2219               |
| <b>Triglycerides</b>     | 421     | -0.073                  | 0.1358               | 421     | -0.02                   | 0.6892               |
| <b>Cholesterol total</b> | 421     | -0.037                  | 0.4432               | 421     | -0.021                  | 0.6712               |
| <b>Cholesterol HDL</b>   | 419     | -0.007                  | 0.8866               | 419     | -0.057                  | 0.242                |
| <b>Cholesterol LDL</b>   | 417     | -0.04                   | 0.4133               | 417     | -0.023                  | 0.6392               |
| <b>Creatinine</b>        | 444     | 0.236                   | <b>&lt;0.0001</b>    | 444     | 0.188                   | <b>0.0001</b>        |
| <b>eGFR</b>              | 444     | -0.24                   | <b>&lt;0.0001</b>    | 444     | -0.187                  | <b>0.0001</b>        |
| <b>Prealbumin</b>        | 385     | 0.075                   | 0.1408               | 385     | 0.08                    | 0.1163               |
| <b>Albumin</b>           | 442     | -0.035                  | 0.4587               | 442     | 0.015                   | 0.7591               |
| <b>Total protein</b>     | 438     | -0.126                  | <b>0.0082</b>        | 438     | -0.118                  | <b>0.0134</b>        |
| <b>CRP</b>               | 430     | -0.107                  | <b>0.0262</b>        | 430     | -0.012                  | 0.8069               |
| <b>Hemoglobin</b>        | 439     | 0.046                   | 0.3365               | 439     | 0.074                   | 0.1203               |
| <b>Vitamin B12</b>       | 408     | 0.001                   | 0.9899               | 408     | -0.09                   | 0.0698               |
| <b>TSH</b>               | 391     | -0.031                  | 0.5475               | 391     | 0.039                   | 0.4444               |
| <b>Folate</b>            | 216     | -0.03                   | 0.6651               | 216     | -0.075                  | 0.2693               |
| <b>Red-cell folate</b>   | 343     | 0.095                   | 0.0805               | 343     | 0.013                   | 0.8078               |

Pearson's correlation coefficient in MCI participants (n) between clinical chemistry analytes and plasma pTau levels.

**Supplementary Figure 1: Correlation between plasma pTau217, plasma pTau181 and hippocampal volume.**

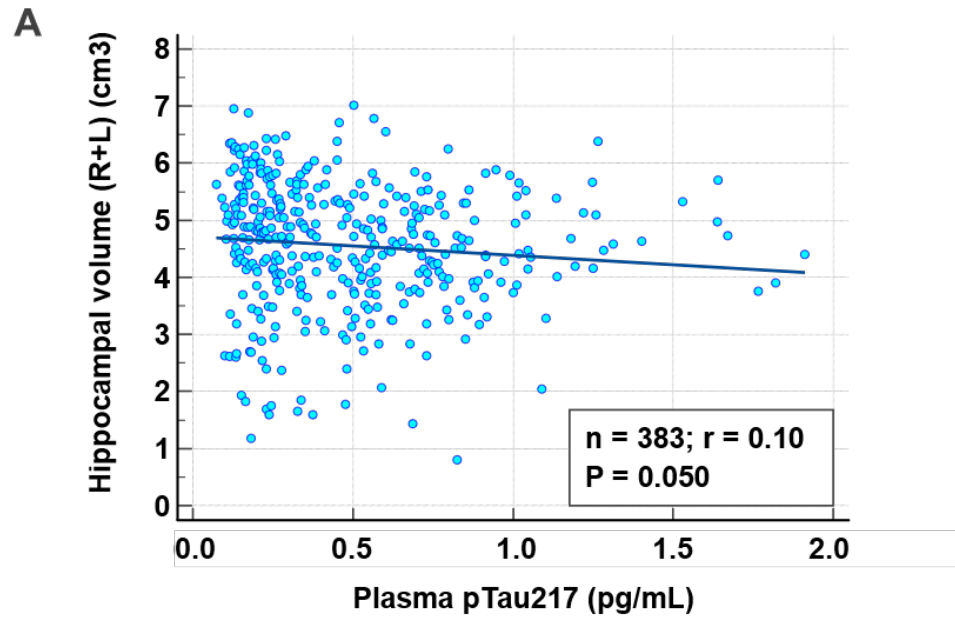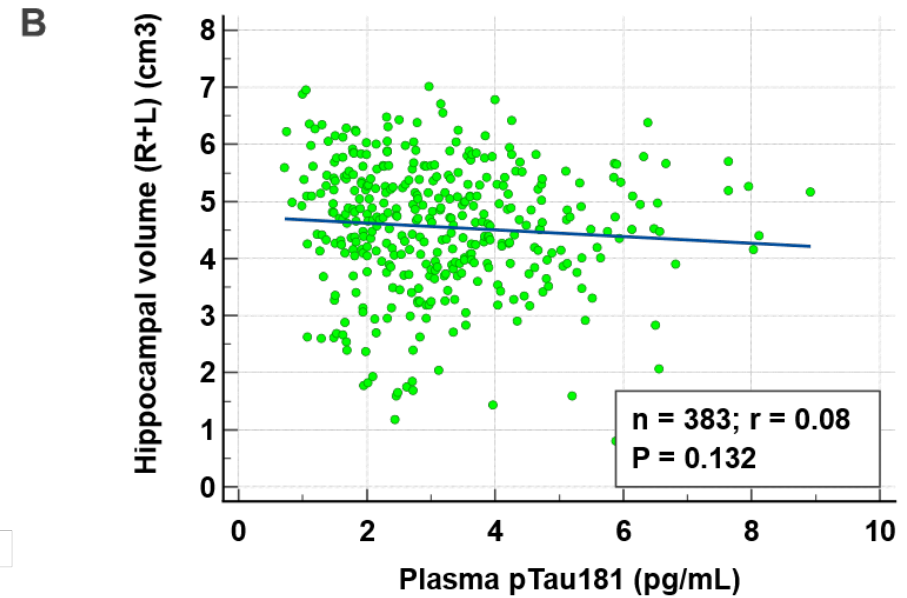

**Legend:**

Values of pTau217 (A) and pTau181 (B) in pg/mL were correlated with Hippocampal volume (R+L) (cm<sup>3</sup>). Pearson's correlation coefficient 'r' are indicated and they did not reach significance.

## Supplementary Figure 2: Correlation between plasma pTau217 and pTau181 and CSF pTau181.

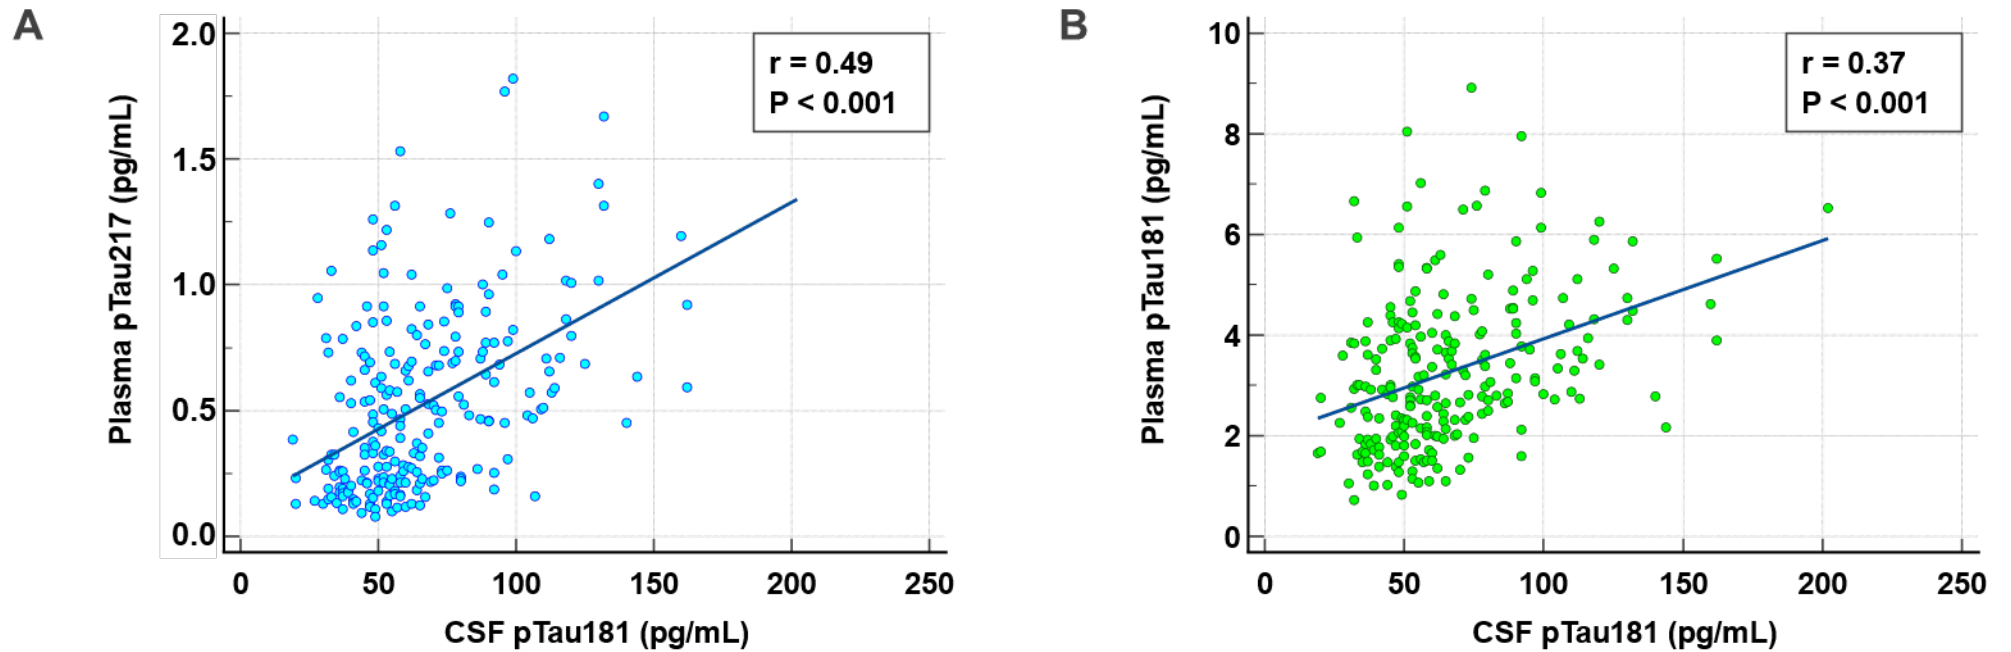

### Legend:

Correlation between plasma pTau217 (Panel A) and pTau181 (Panel B) and CSF pTau181 in MCI according to amyloid status. Pearson's correlation coefficients 'r' were 0.49 (95% Confidence interval 0.38 to 0.58) and 0.37 (95% Confidence interval 0.26 to 0.48) for plasma pTau217 vs. CSF pTau181, and plasma pTau181 vs. CSF pTau181, respectively.

**Supplementary Figure 3: Distribution of plasma pTau217 and pTau181 and ROC curves of plasma pTau217, plasma pTau181 and CSF pTau181 and CSF A $\beta$ 42/40 in MCI according to conversion to AD.**

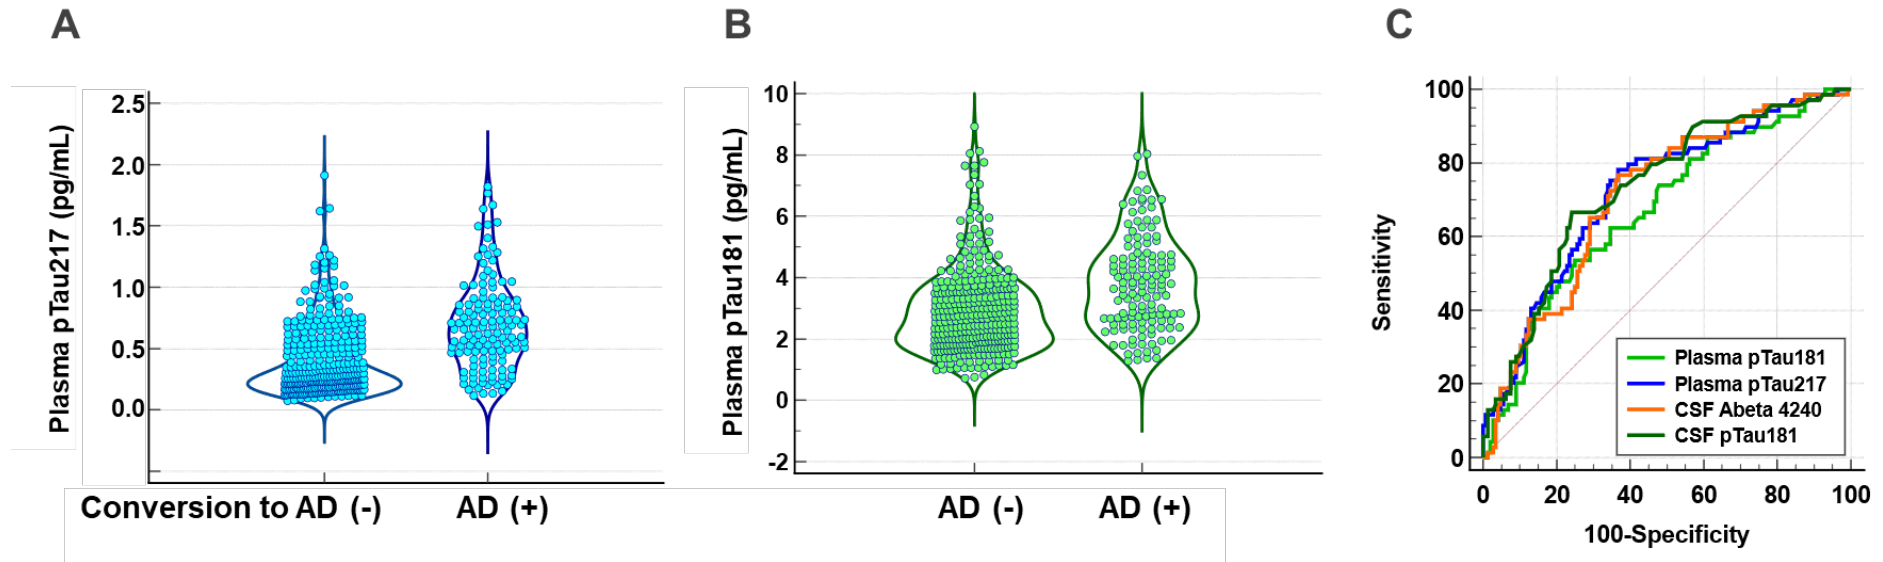

**Legend:**

Values of pTau217 (A) and pTau181 (B) in pg/mL are represented in the conversion to AD (-) and (+) populations. (C) ROC curves of plasma pTau217, pTau181 and CSF pTau181 and Abeta42/40 in MCI according to conversion to AD. Respective AUC (95% Confidence interval): plasma pTau217: 0.722 (0.657 to 0.781), plasma pTau181 0.673 (0.606 to 0.736), CSF pTau181: 0.712 (0.646 to 0.771), and CSF A $\beta$ 42/40: 0.733 (0.668 to 0.791).
